# Supplementary material
Source: publisher figshare collection journal article supplement (https://diabetesjournals.figshare.com/ndownloader/files/28694379)
Supplement: Supplementary file 1 [file 28694379]

## Sheet: Sheet1
Gene	Base_change	Protein_change	ACMG_category
CEL	c.957delC	p.I319fs	Likely pathogenic
GCK	c.T185C	p.V62A	Likely pathogenic
GCK	c.G835C	p.E279Q	Likely pathogenic
GCK	c.177_180del	p.P59fs	Likely pathogenic
GCK	c.A760C	p.N254H	Likely pathogenic
GCK	c.1360delG	p.A454fs	Likely pathogenic
GCK	c.C617T	p.T206M	Likely pathogenic
GCK	c.C571T	p.R191W	Likely pathogenic
GCK	c.T1235G	p.V412G	Likely pathogenic
GCK	c.C1174T	p.R392C	Likely pathogenic
GCK	c.C571T	p.R191W	Likely pathogenic
GCK	c.C158T	p.A53V	Likely pathogenic
GCK	c.G1015A	p.E339K	Likely pathogenic
GCK	c.G835C	p.E279Q	Likely pathogenic
GCK	c.G835C	p.E279Q	Likely pathogenic
GCK	c.C571T	p.R191W	Likely pathogenic
GCK	c.G835C	p.E279Q	Likely pathogenic
GCK	c.G676A	p.V226M	Pathogenic
GCK	c.C1322T	p.S441L	Pathogenic
GCK	c.T389C	p.I130T	Pathogenic
GCK	c.G184A	p.V62M	Pathogenic
GCK	c.680-2A>G	.	Pathogenic
GCK	c.C683T	p.T228M	Pathogenic
GCK	c.1019+1G>A	.	Pathogenic
HNF1A	c.865dupC	p.G288fs	Likely pathogenic
HNF1A	c.C1135G	p.P379A	Likely pathogenic
HNF1A	c.T433C	p.S145P	Likely pathogenic
HNF1A	c.C1340T	p.P447L	Likely pathogenic
HNF1A	c.C475T	p.R159W	Likely pathogenic
HNF1A	c.C1556T	p.P519L	Likely pathogenic
HNF1A	c.1713delC	p.D571fs	Likely pathogenic
HNF1A	c.C1135G	p.P379A	Likely pathogenic
HNF1A	c.865dupC	p.G288fs	Likely pathogenic
HNF1A	c.G599T	p.R200L	Likely pathogenic
HNF1A	c.865dupC	p.G288fs	Likely pathogenic
HNF1A	c.C811T	p.R271W	Likely pathogenic
HNF1A	c.A797G	p.N266S	Likely pathogenic
HNF1A	c.997_1012del	p.V333fs	Likely pathogenic
HNF1A	c.C1135G	p.P379A	Likely pathogenic
HNF1A	c.C1556T	p.P519L	Likely pathogenic
HNF1A	c.C1135G	p.P379A	Likely pathogenic
HNF1A	c.C1135G	p.P379A	Likely pathogenic
HNF1A	c.C1135G	p.P379A	Likely pathogenic
HNF1A	c.1512delC	p.S504fs	Likely pathogenic
HNF1A	c.C475T	p.R159W	Likely pathogenic
HNF1A	c.C1135G	p.P379A	Likely pathogenic
HNF1A	c.C1136G	p.P379R	Likely pathogenic
HNF1A	c.C1135G	p.P379A	Likely pathogenic
HNF1A	c.C1340T	p.P447L	Likely pathogenic
HNF1A	c.C1135G	p.P379A	Likely pathogenic
HNF1A	c.C1135G	p.P379A	Likely pathogenic
HNF1A	c.C1136G	p.P379R	Likely pathogenic
HNF1A	c.C1544A	p.T515K	Likely pathogenic
HNF1A	c.C335T	p.P112L	Pathogenic
HNF1A	c.G599A	p.R200Q	Pathogenic
HNF1A	c.G3A	p.M1I	Pathogenic
HNF1A	c.C335T	p.P112L	Pathogenic
HNF1A	c.T654A	p.Y218X	Pathogenic
HNF1A	c.C373T	p.Q125X	Pathogenic
HNF1A	c.443delT	p.L148fs	Pathogenic
HNF1A	c.C526T	p.Q176X	Pathogenic
HNF1A	c.G599A	p.R200Q	Pathogenic
HNF1A	c.1137delT	p.P379fs	Pathogenic
HNF1A	c.C685T	p.R229X	Pathogenic
HNF1A	c.C1531T	p.Q511X	Pathogenic
HNF1A	c.1137delT	p.P379fs	Pathogenic
HNF1A	c.G58C	p.G20R	Pathogenic
HNF1A	c.526+1G>A	.	Pathogenic
HNF4A	c.225-2A>G		Pathogenic
HNF4A	c.50-1G>C		Pathogenic
HNF4A	c.326delG	p.R109fs	Likely pathogenic
HNF4A	c.326delG	p.R109fs	Likely pathogenic
HNF4A	c.G313A	p.V105I	Likely pathogenic
HNF4A	c.1058delC	p.S353fs	Likely pathogenic
HNF4A	c.425delC	p.S142fs	Likely pathogenic
HNF4A	c.C1071A	p.C357X	Likely pathogenic
HNF4A	c.G313A	p.V105I	Likely pathogenic
HNF4A	c.326delG	p.R109fs	Likely pathogenic
HNF4A	c.G313A	p.V105I	Likely pathogenic
HNF4A	c.G778T	p.E260X	Pathogenic
HNF4A	c.T2C	p.M1T	Pathogenic
HNF4A	c.191delG	p.R64fs	Pathogenic
HNF4A	c.C331T	p.R111W	Pathogenic
HNF4A	c.C331T	p.R111W	Pathogenic
INS,INS-IGF2	c.G137A	p.R46Q	Pathogenic
INS,INS-IGF2	c.G17A	p.R6H	Pathogenic
INS,INS-IGF2	c.G17A	p.R6H	Pathogenic
INS\x3bINS-IGF2	c.G169T	p.E57X	Likely pathogenic
PDX1	c.727dupC	p.P242fs	Likely pathogenic
PDX1	c.183delC	p.S61fs	Likely pathogenic
PDX1	c.183delC	p.S61fs	Likely pathogenic
PDX1	c.C681A	p.C227X	Likely pathogenic
PDX1	c.183delC	p.S61fs	Likely pathogenic
